# Supplementary figures and images for: The Influence of Terrain Smoothing on Simulated Convective Boundary-Layer Depths in Mountainous Terrain
Source: MDPI journal article supplement (doi:10.3390/atmos15020145), 2024-01-24

Relative CBL depth difference ((10 km - 3.3 km)/(3.3 km)) [%]

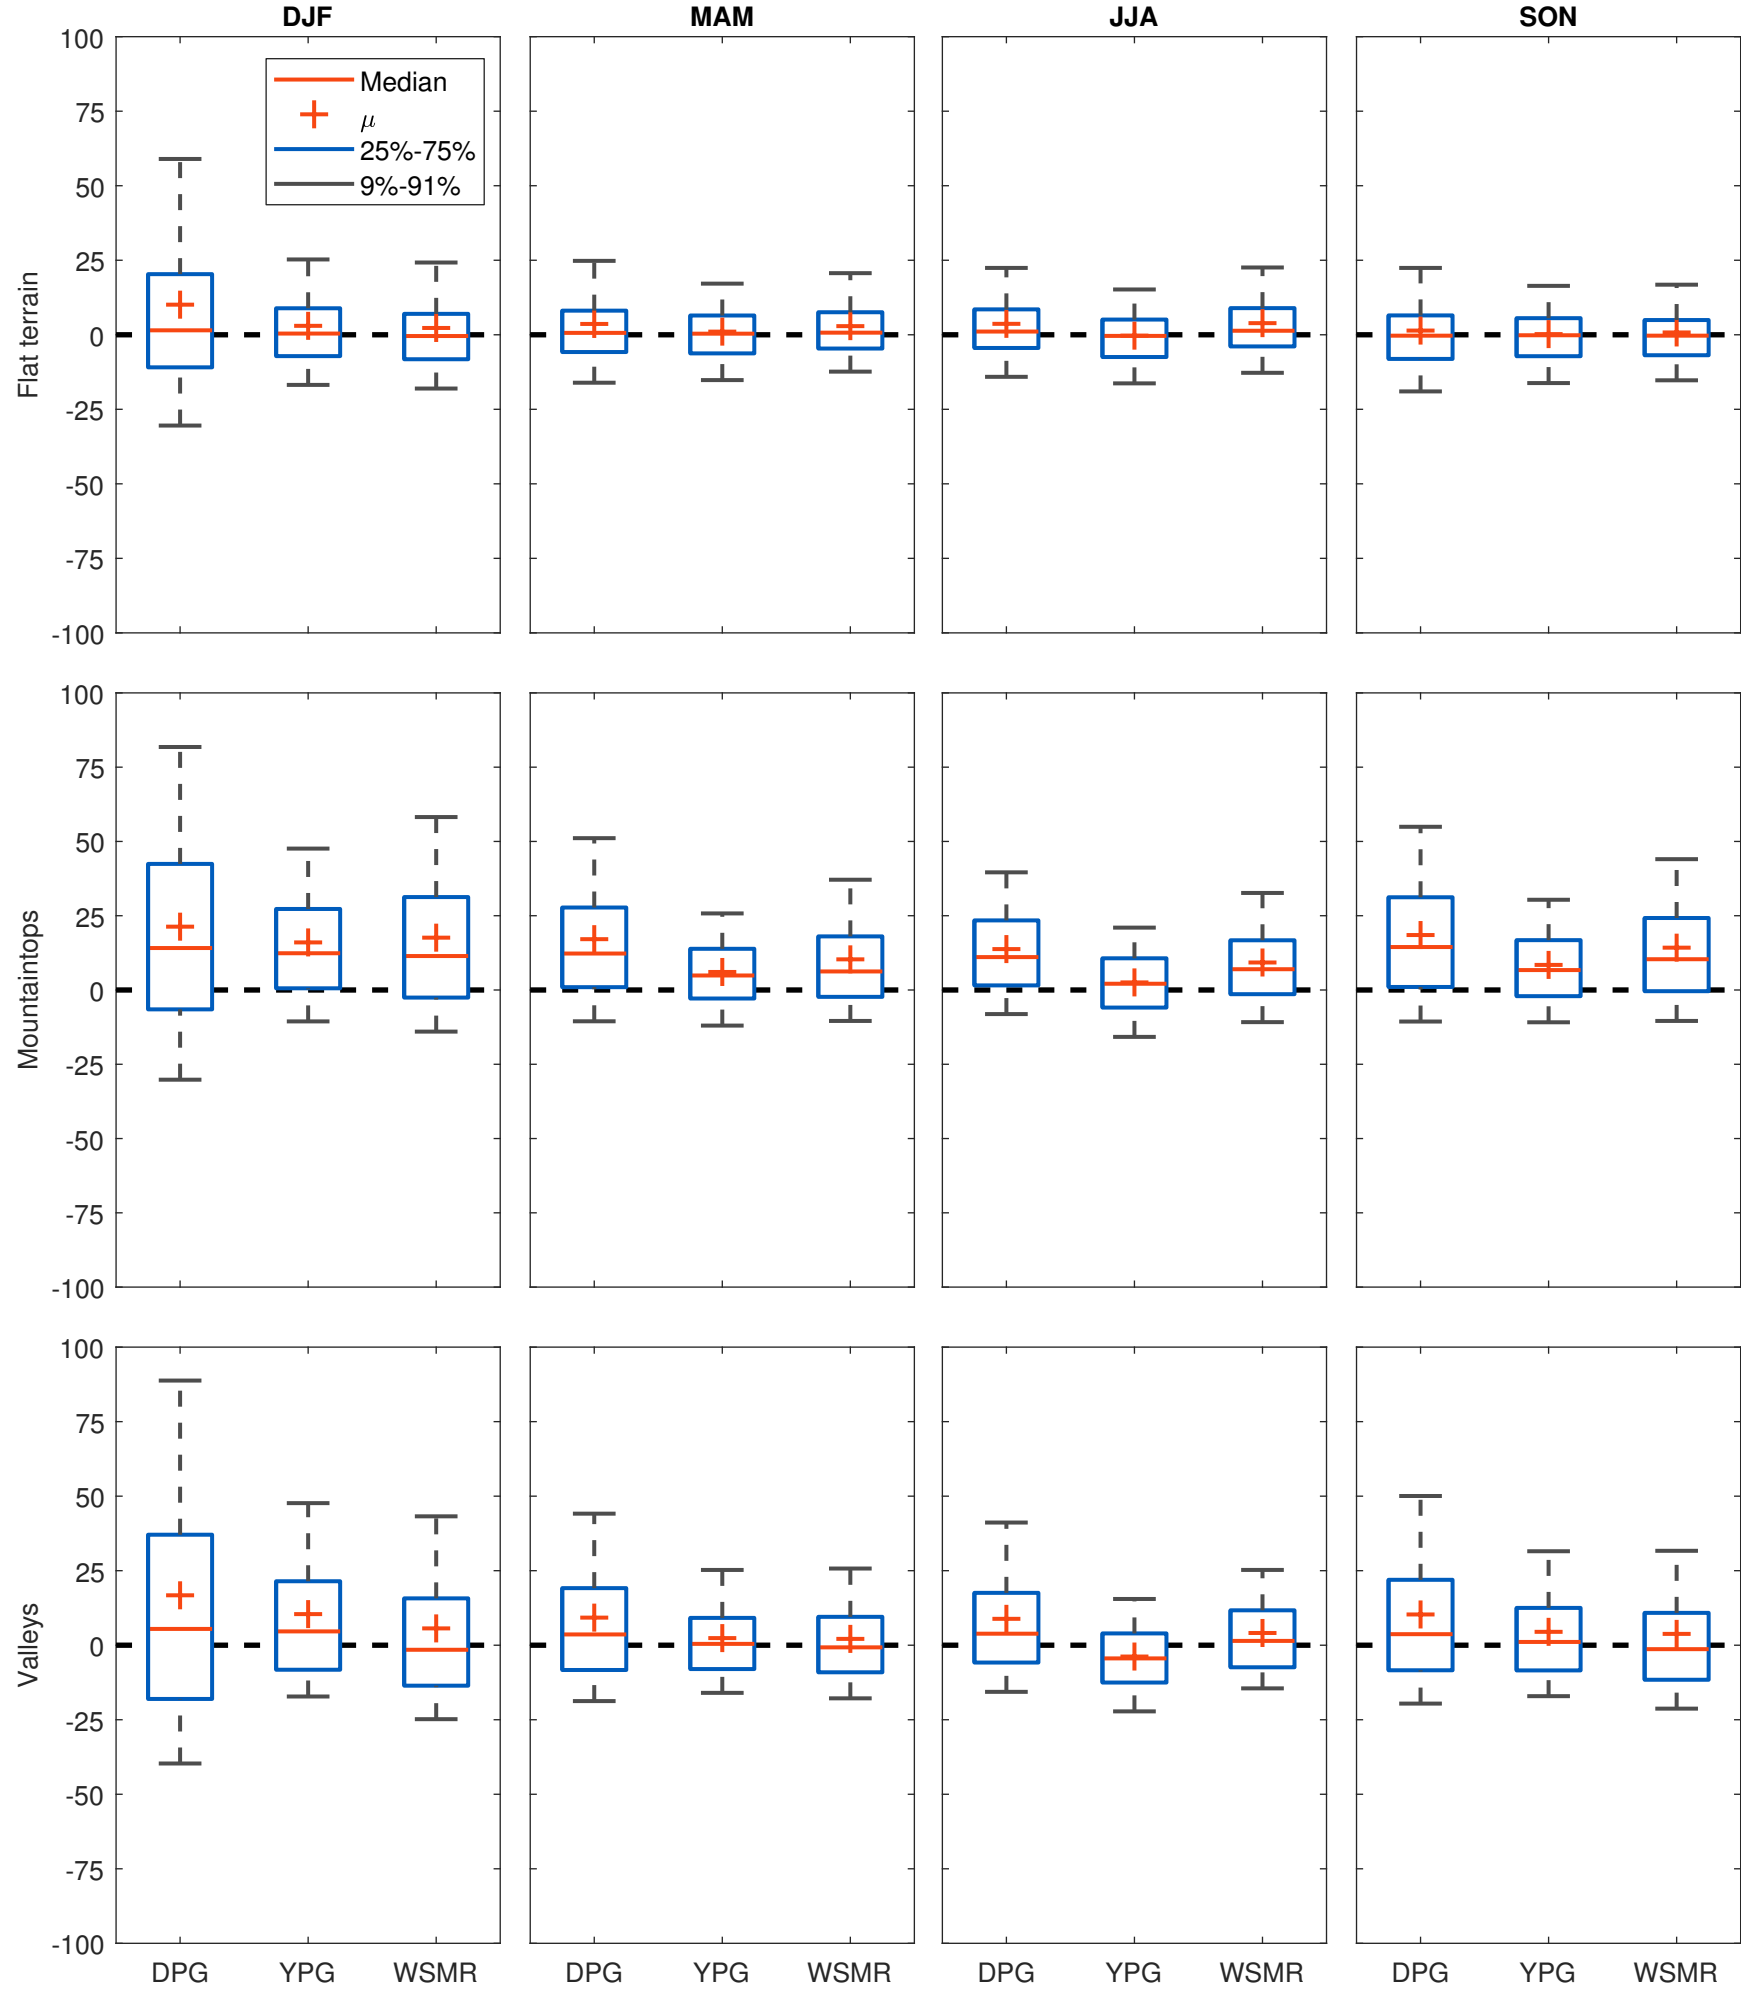

Supplement: s1 [file s1]

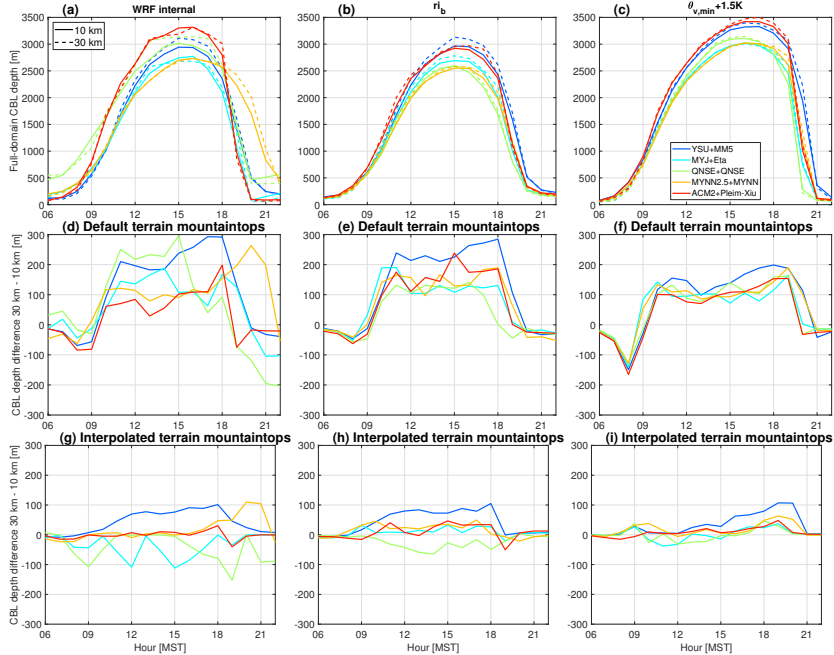

Supplement: s1 [file s1]

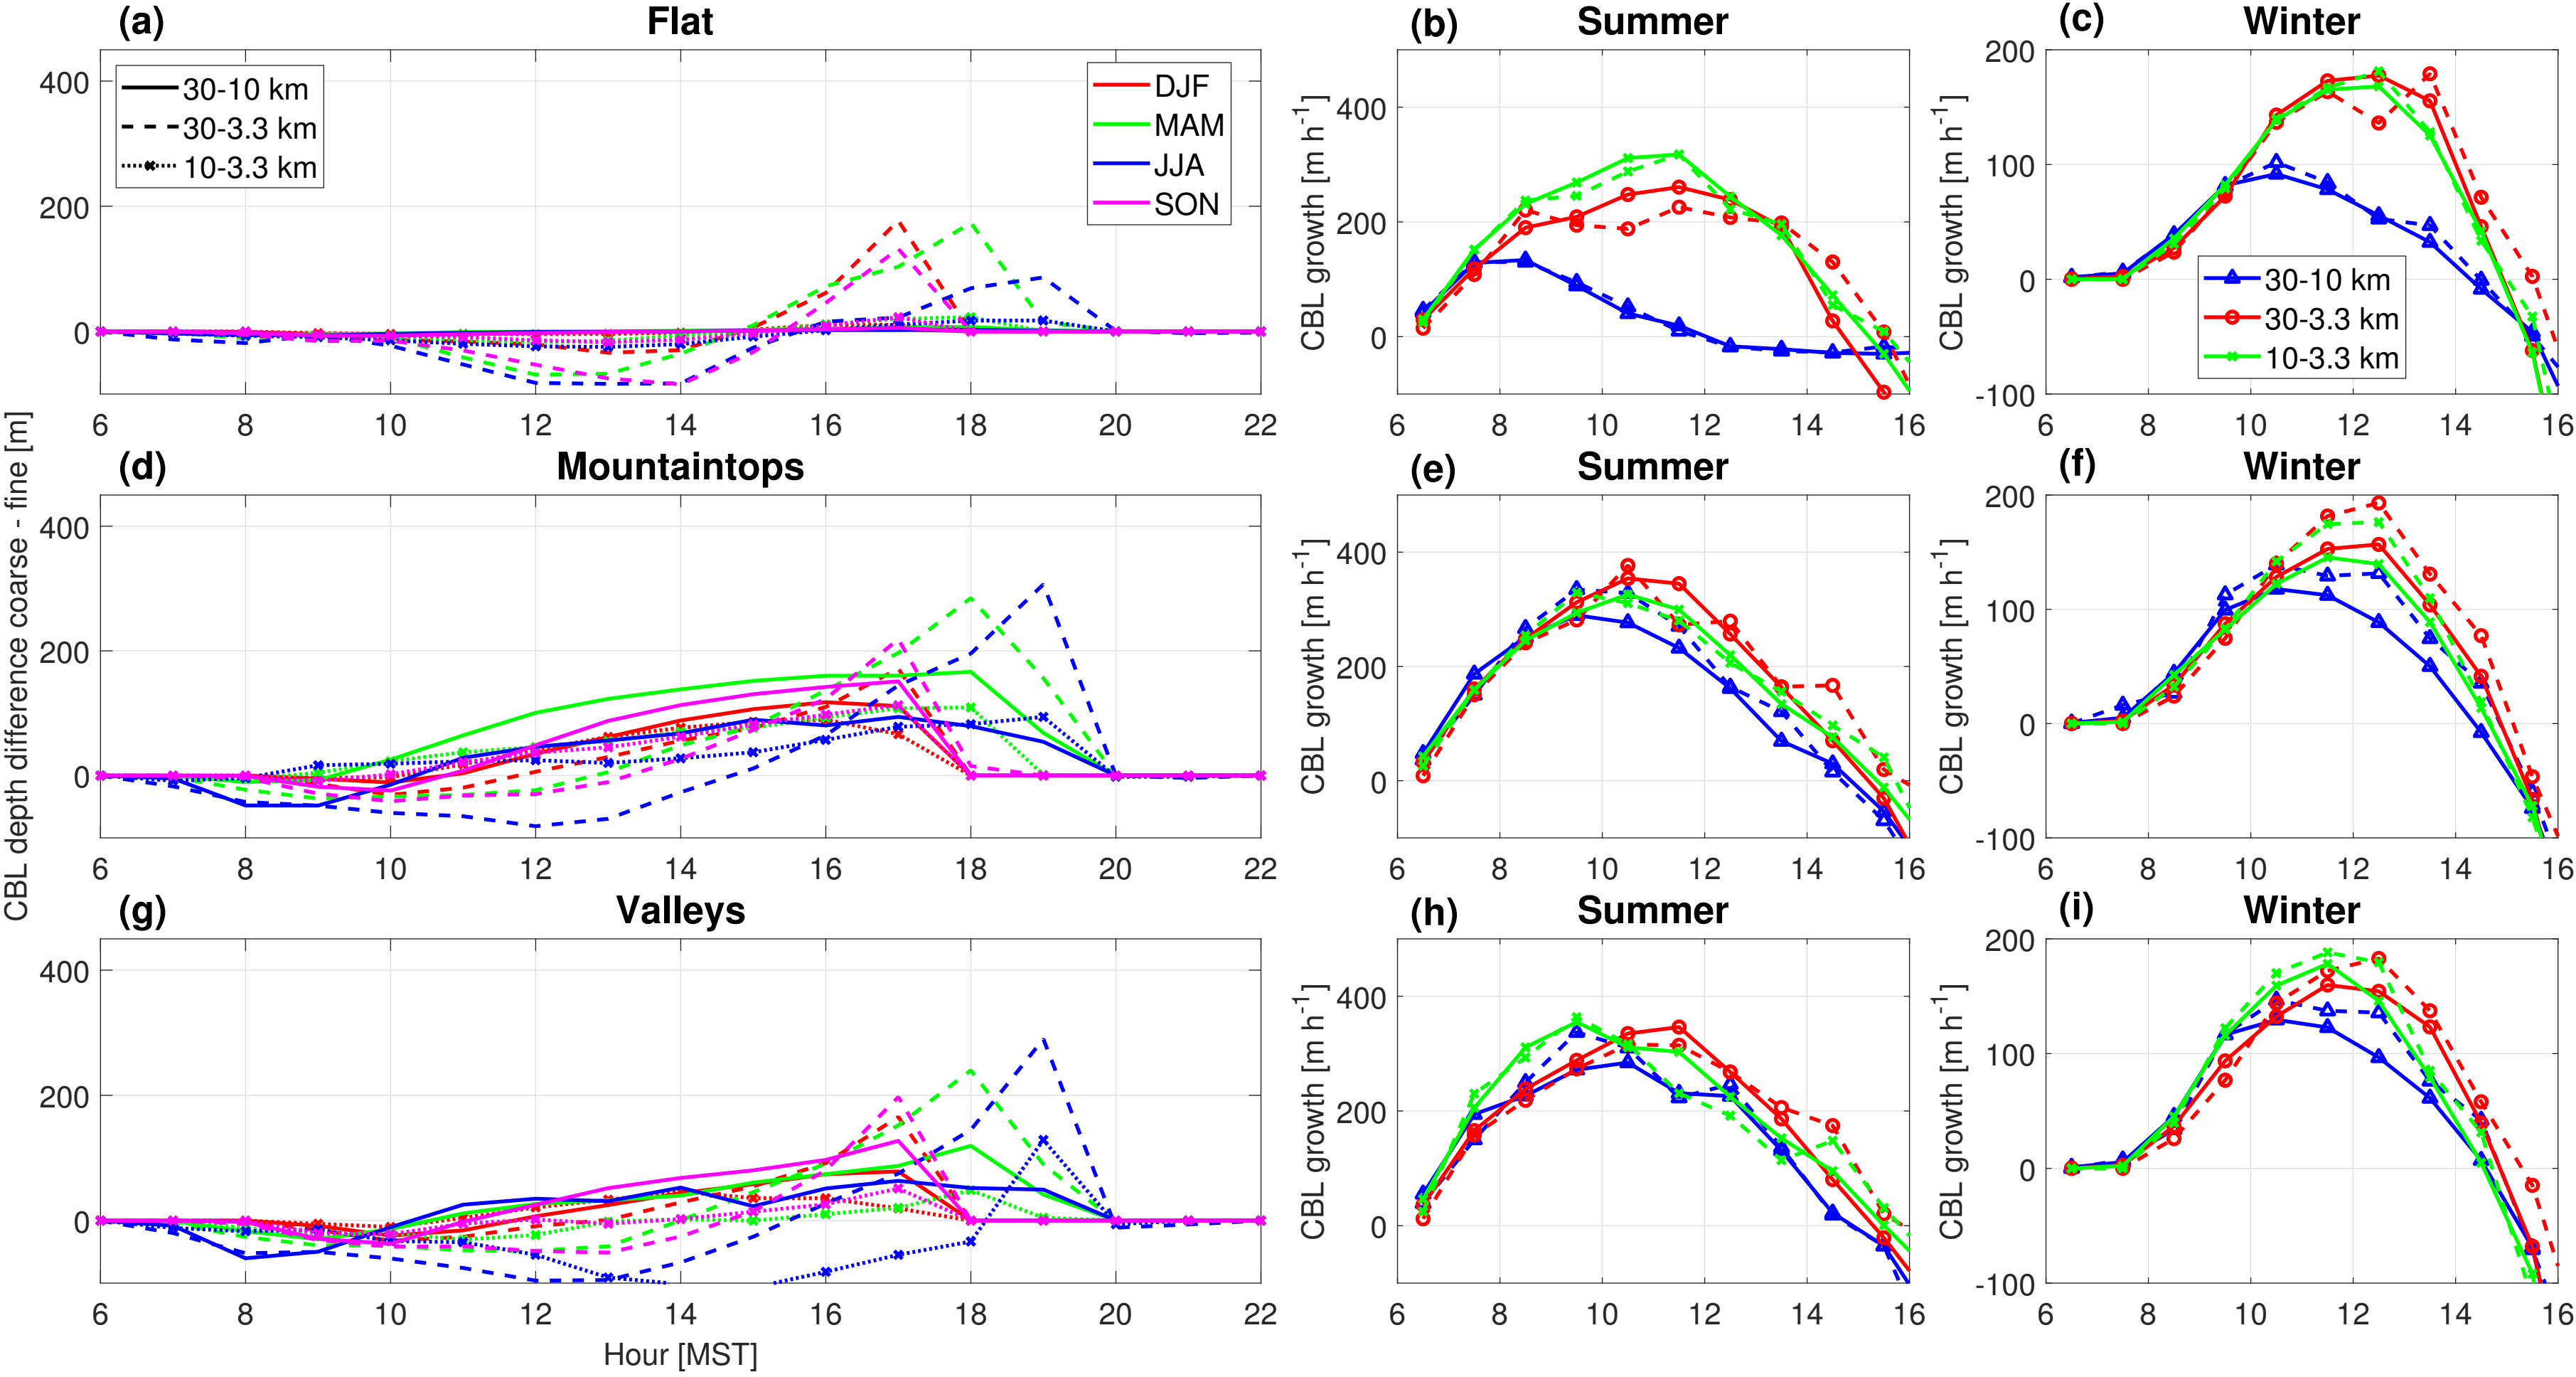

Supplement: s1 [file s1]

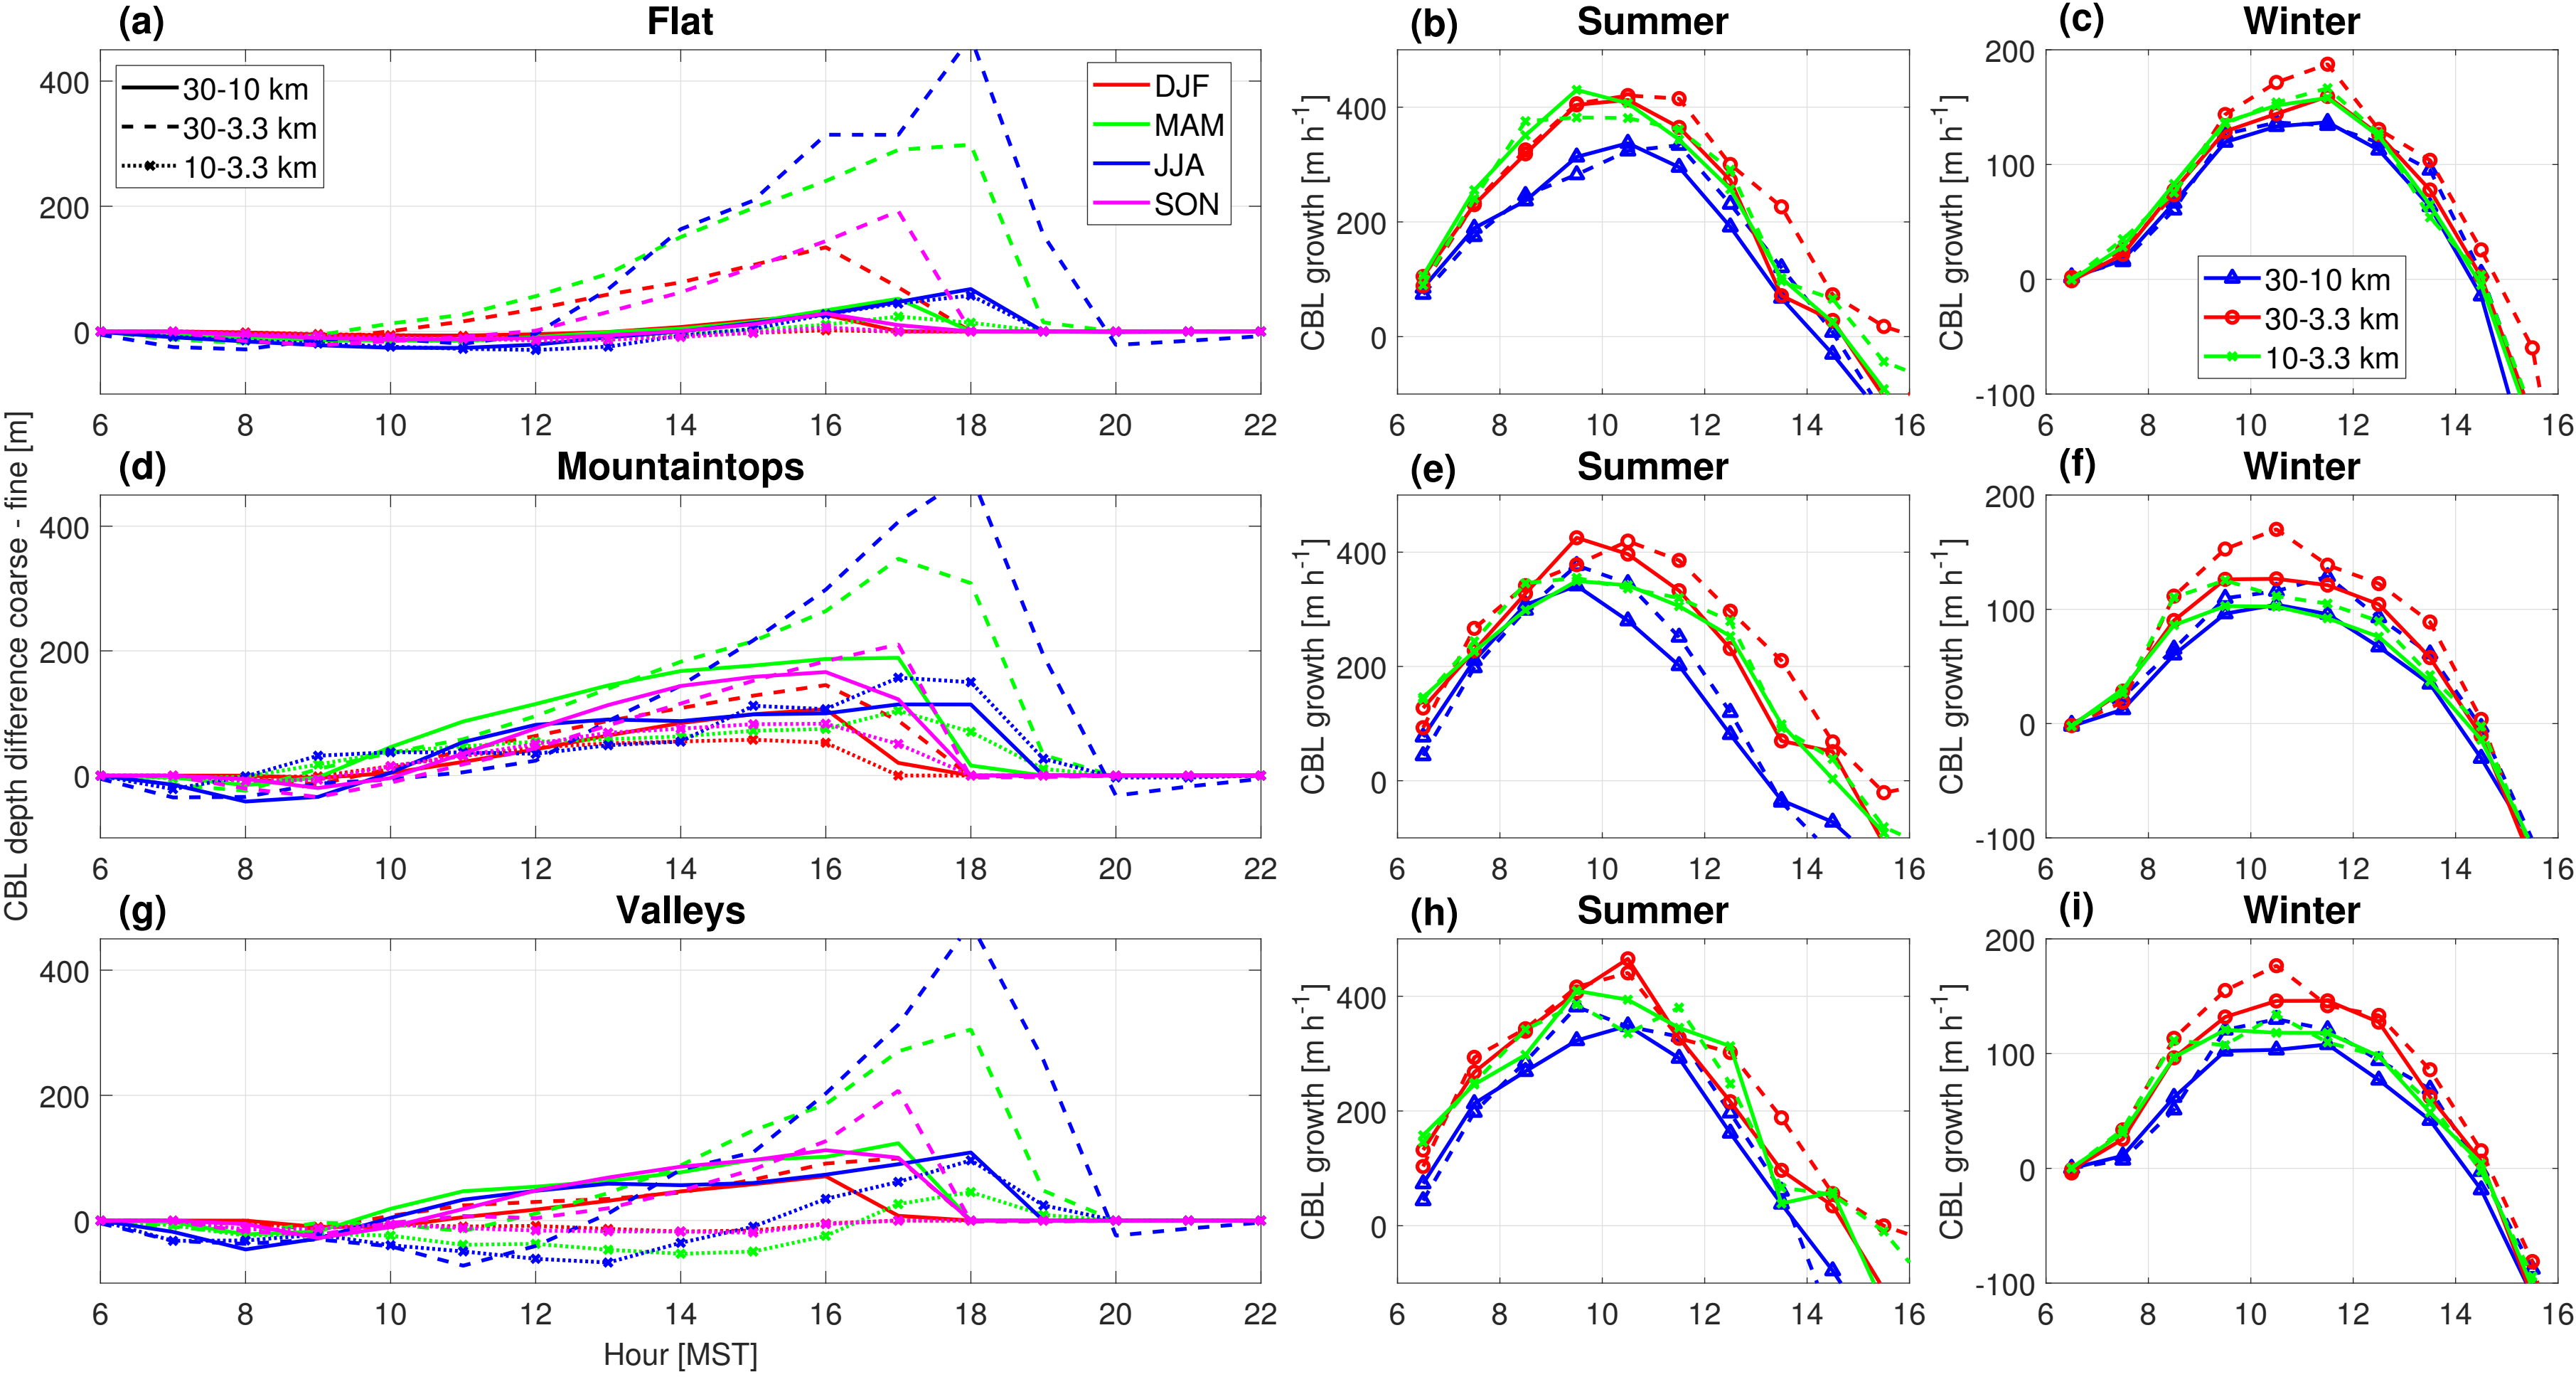

Supplement: s1 [file s1]

July 10 2013

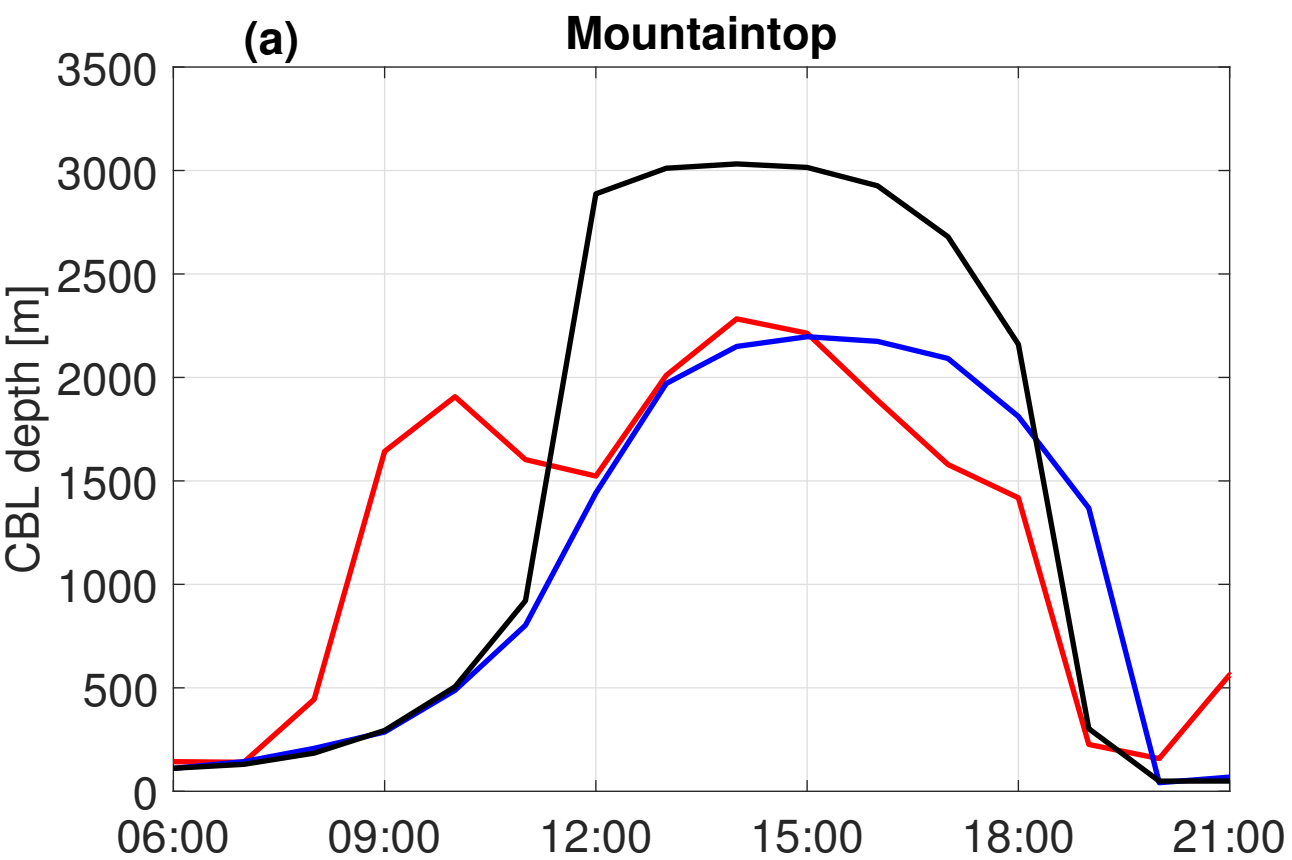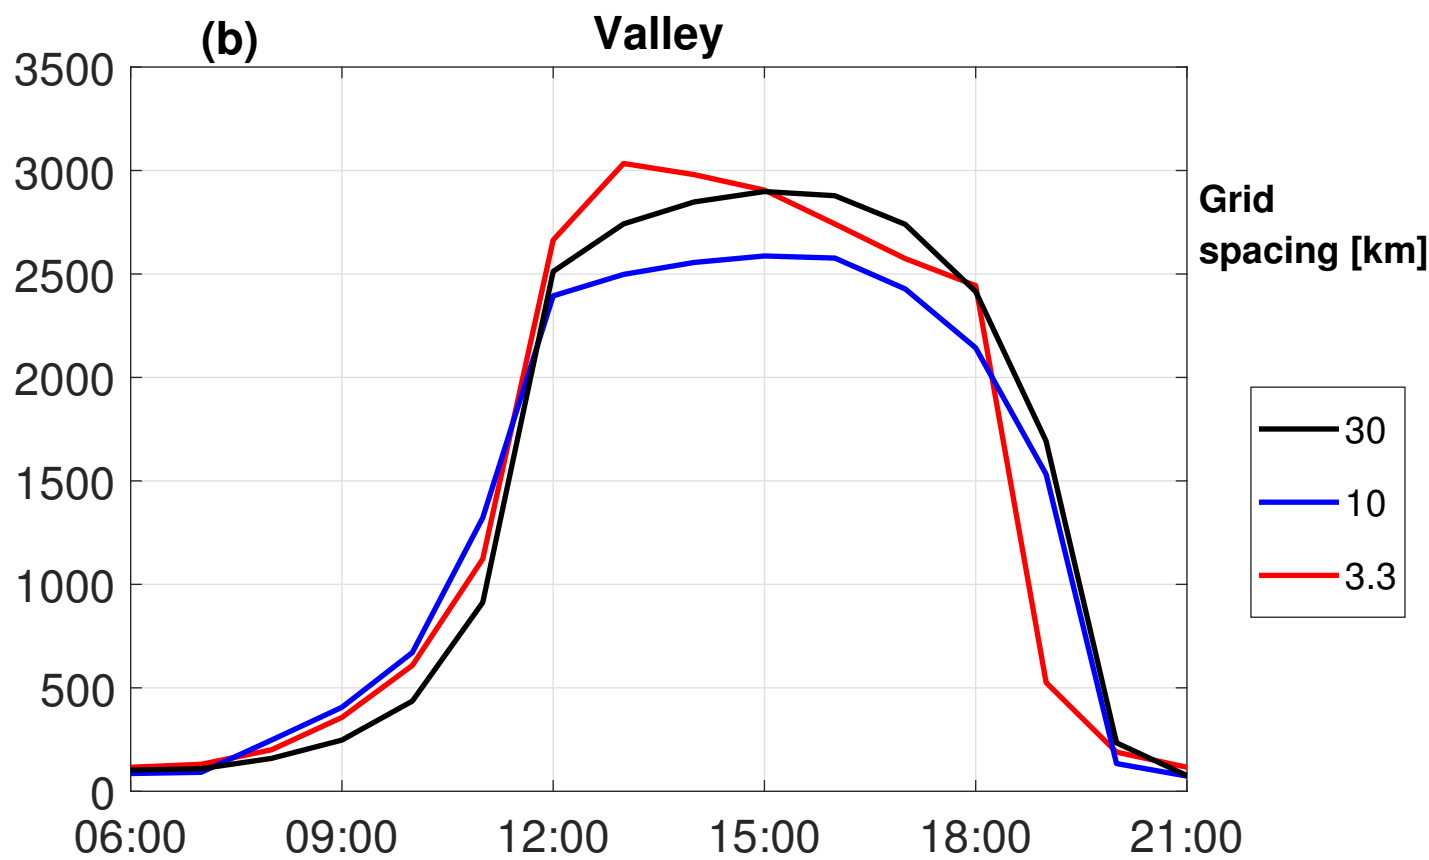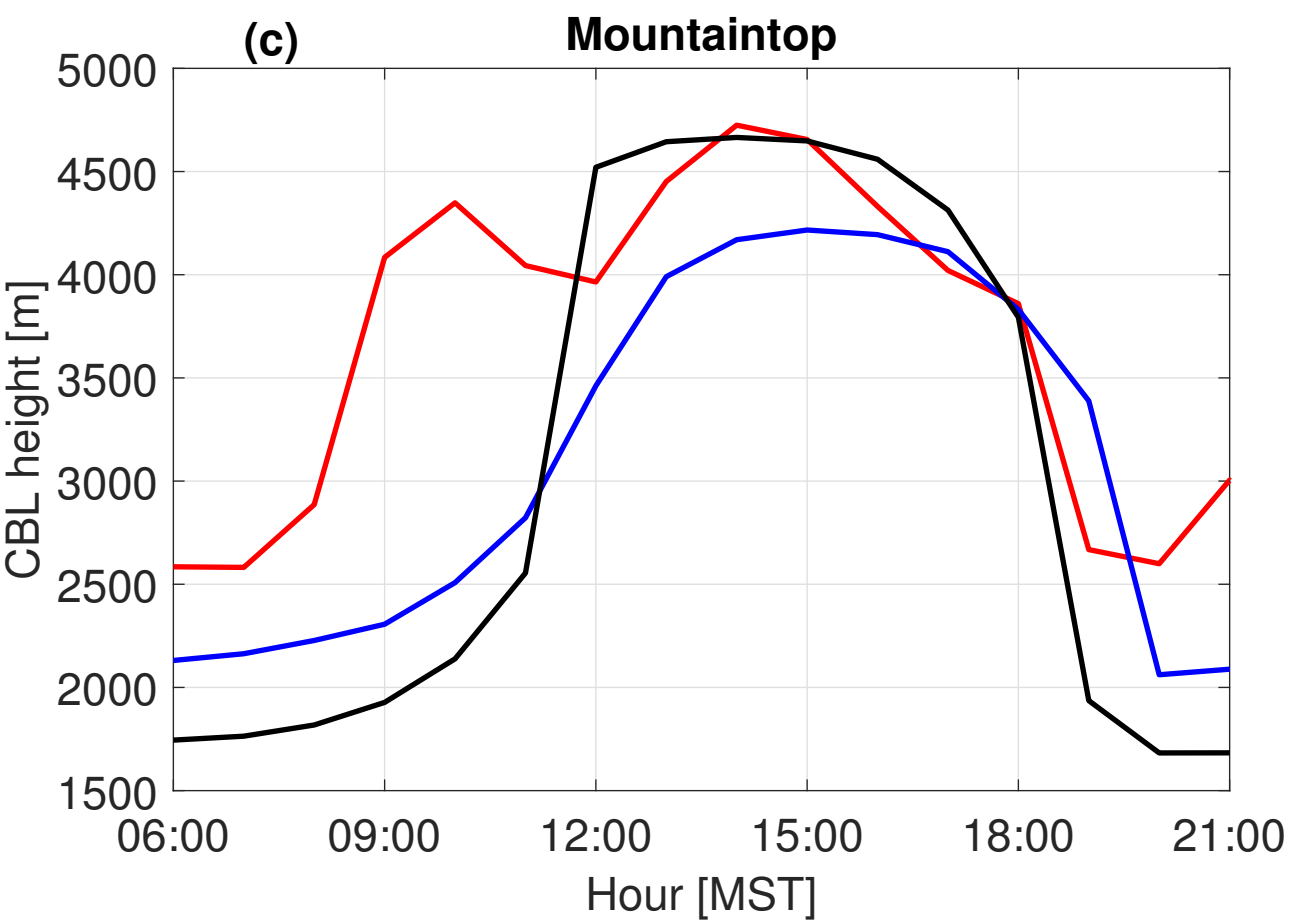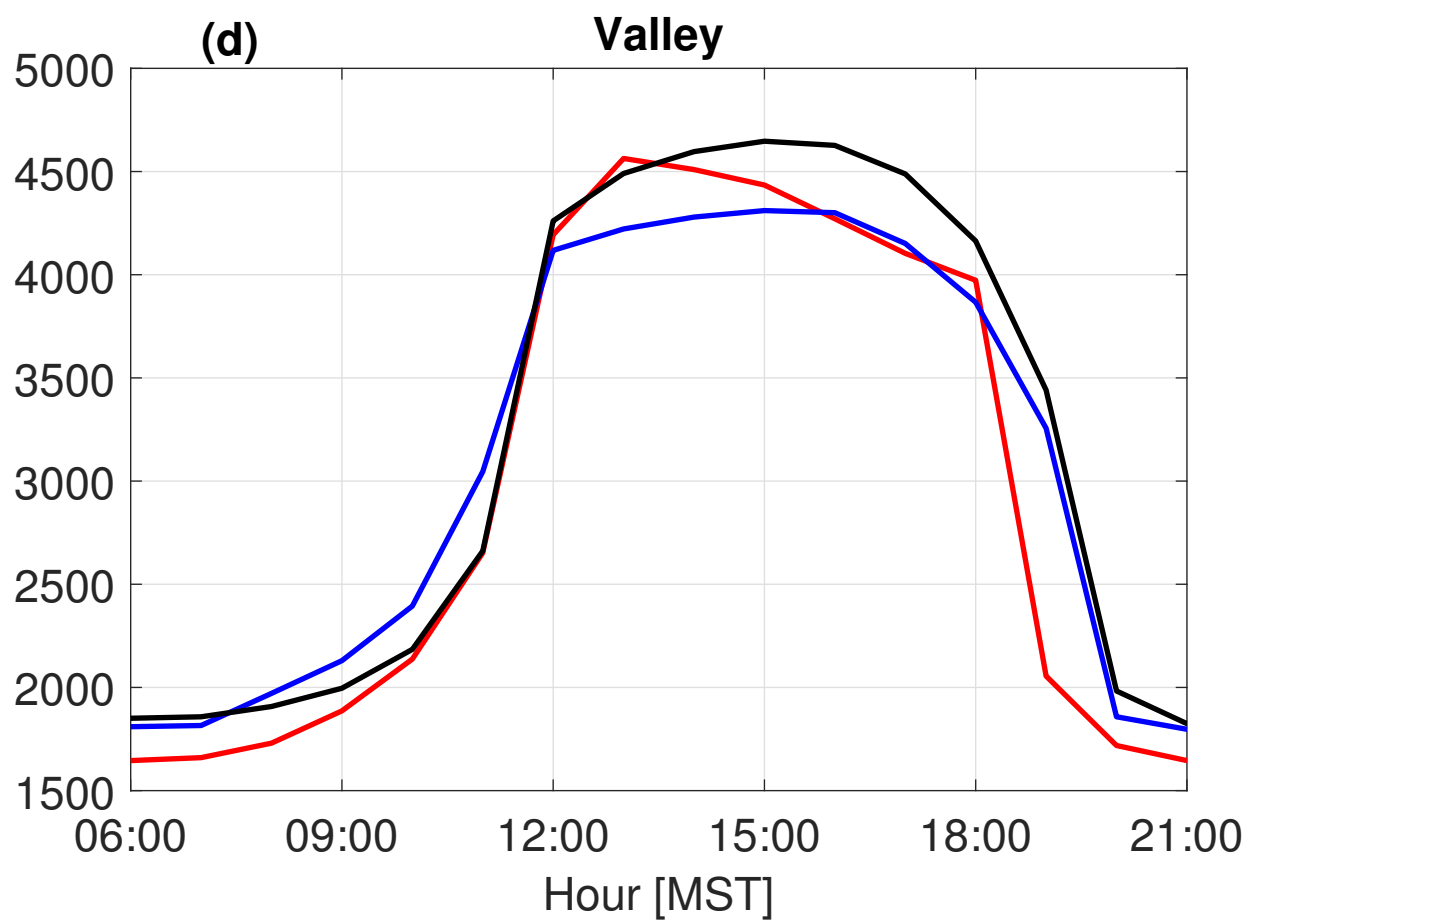

Supplement: s1 [file s1]

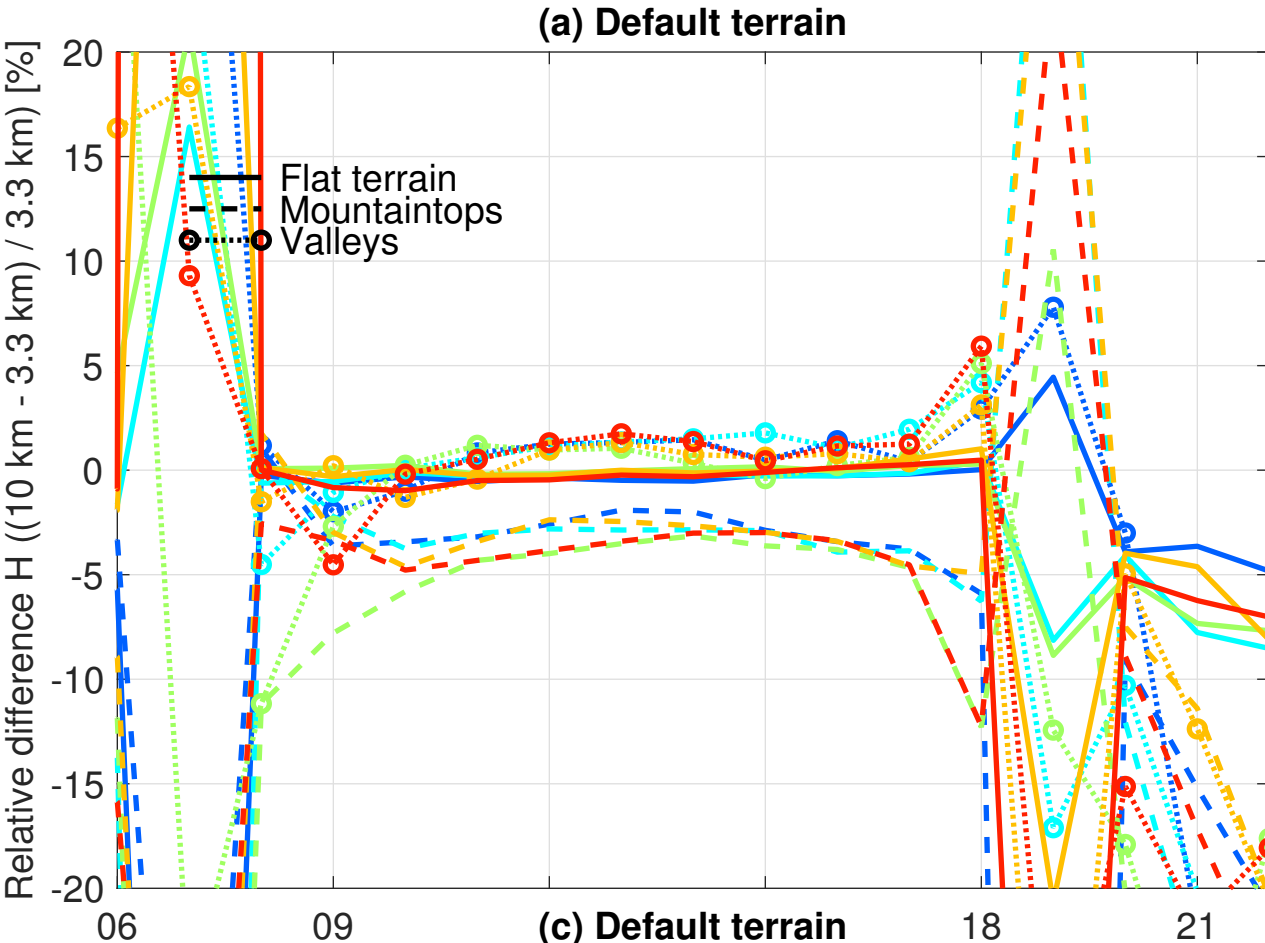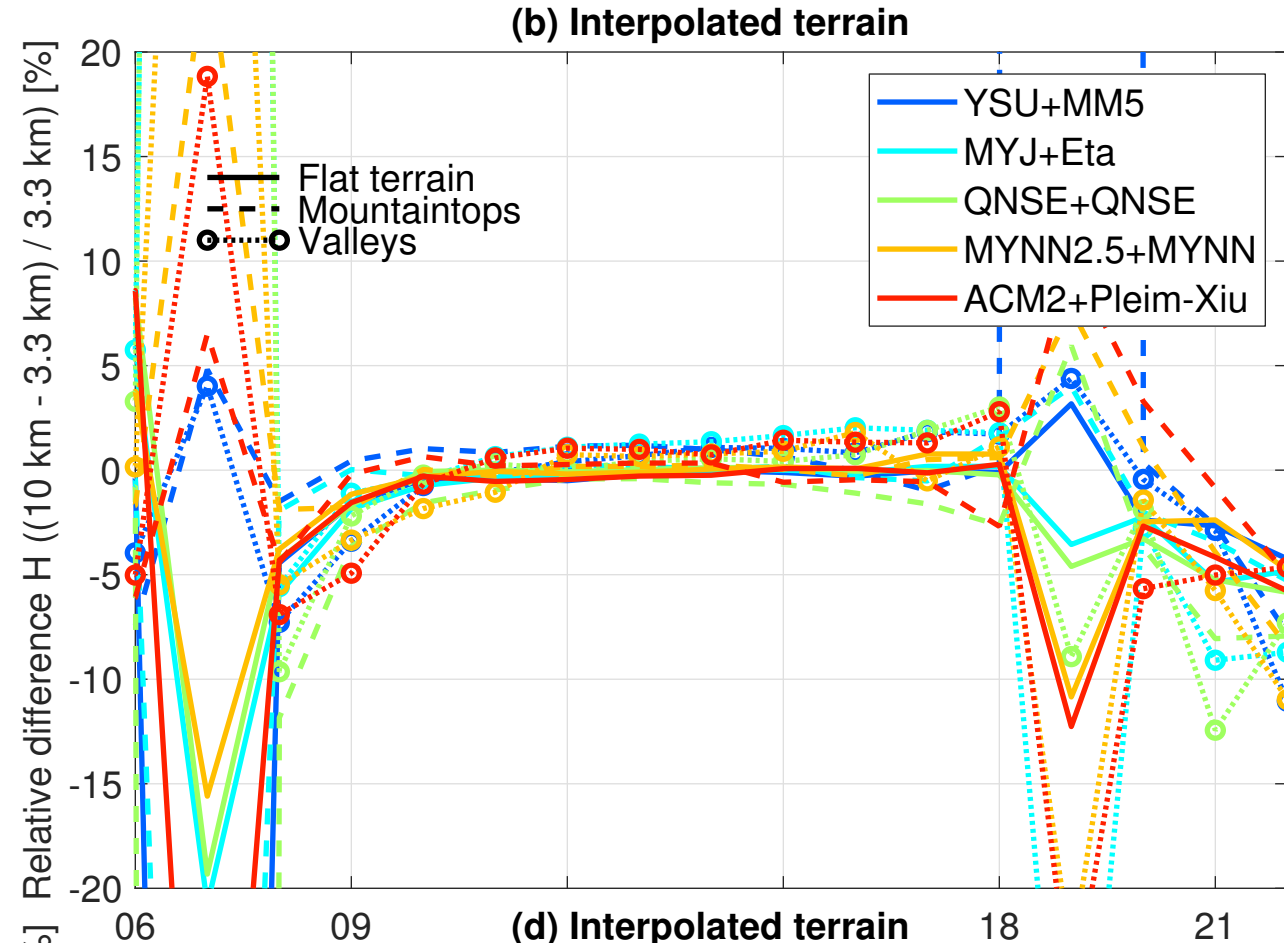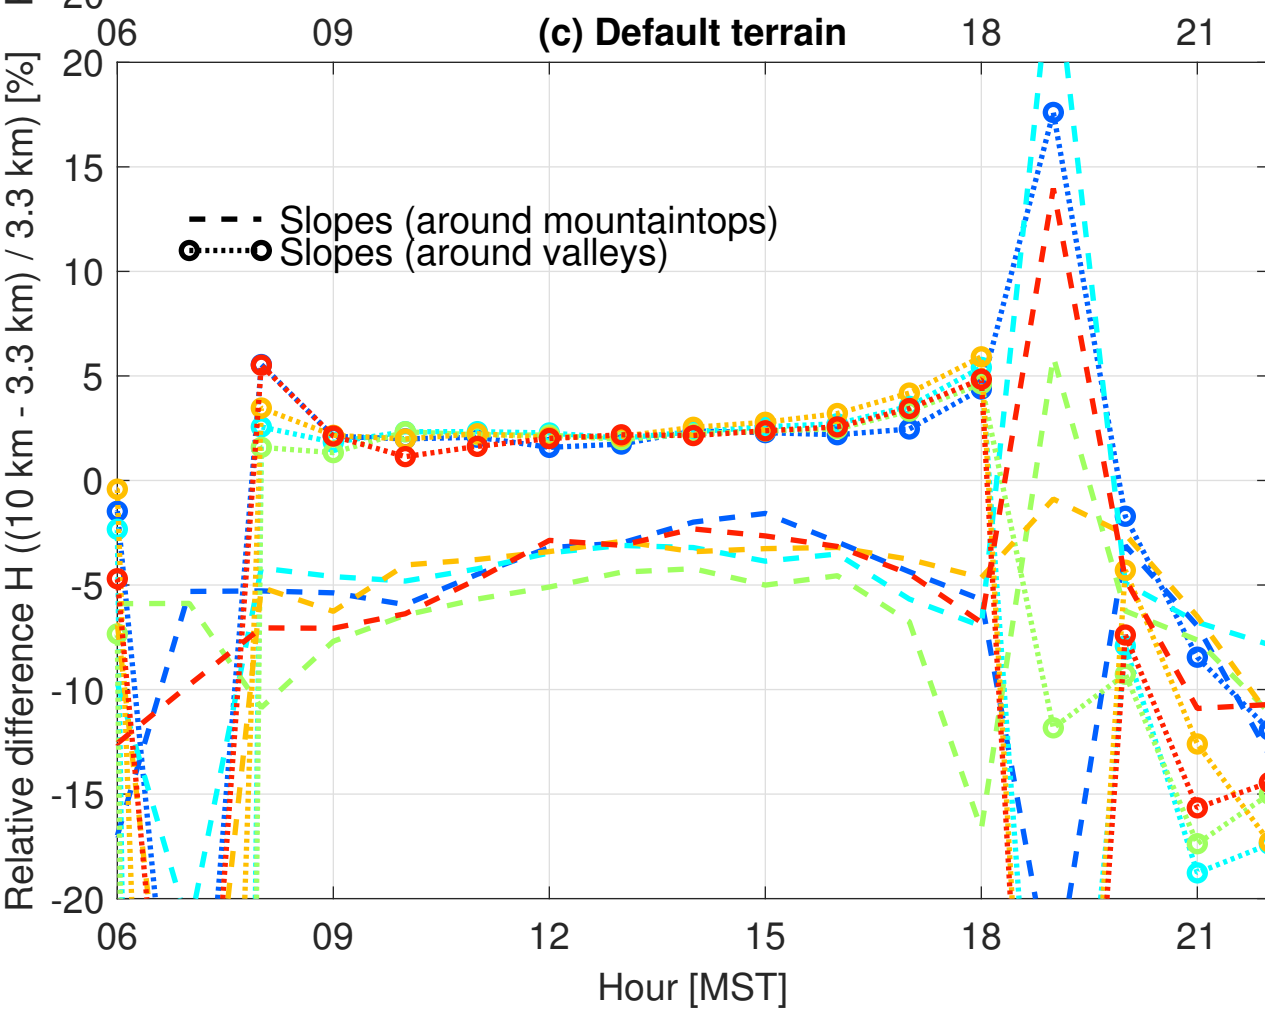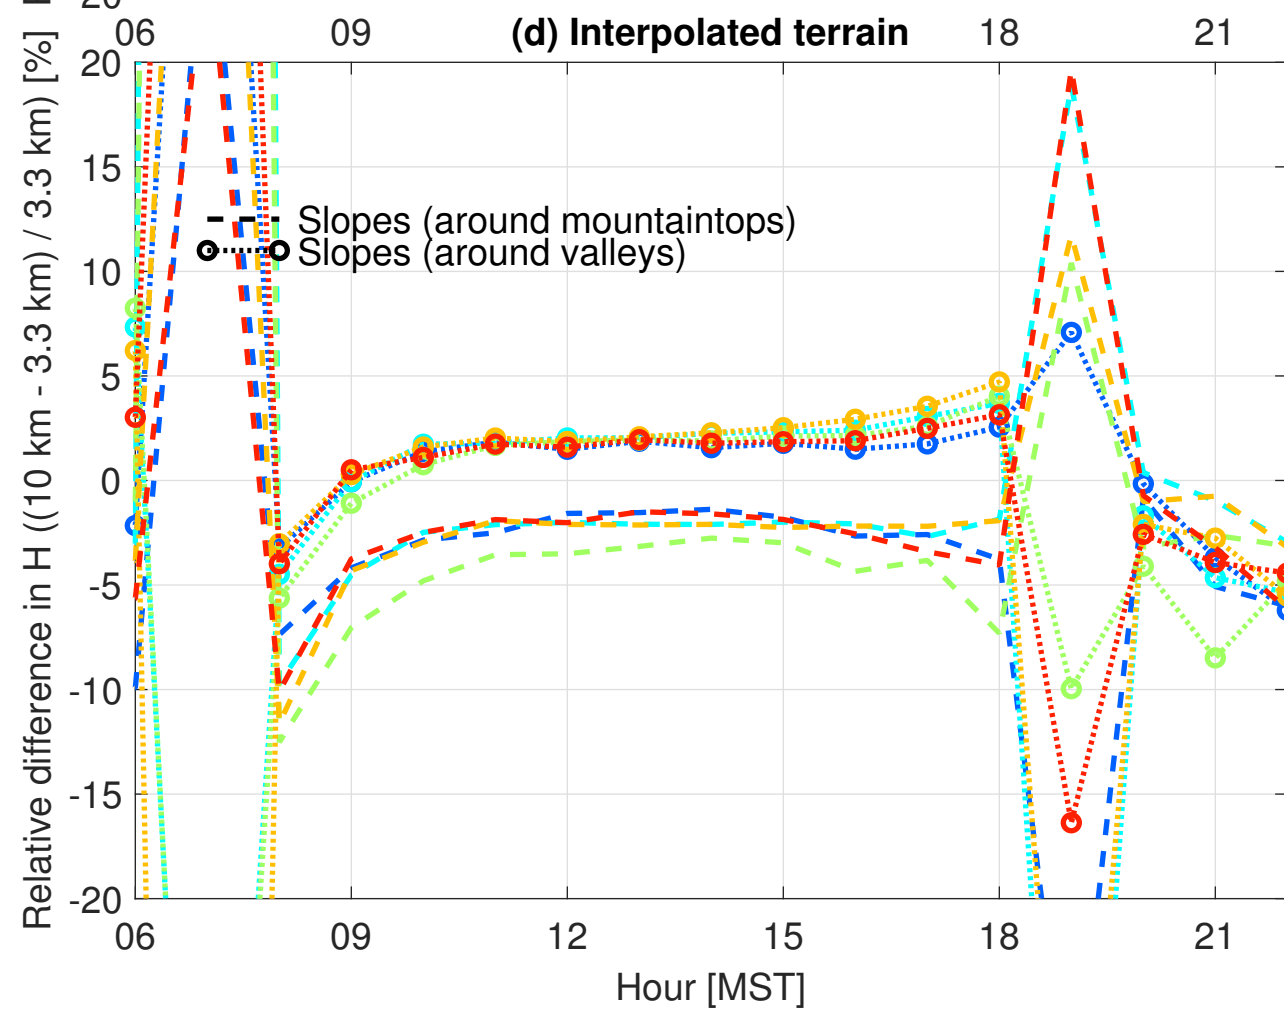

Supplement: s1 [file s1]

CBL depth difference 30 km - 10 km [m]

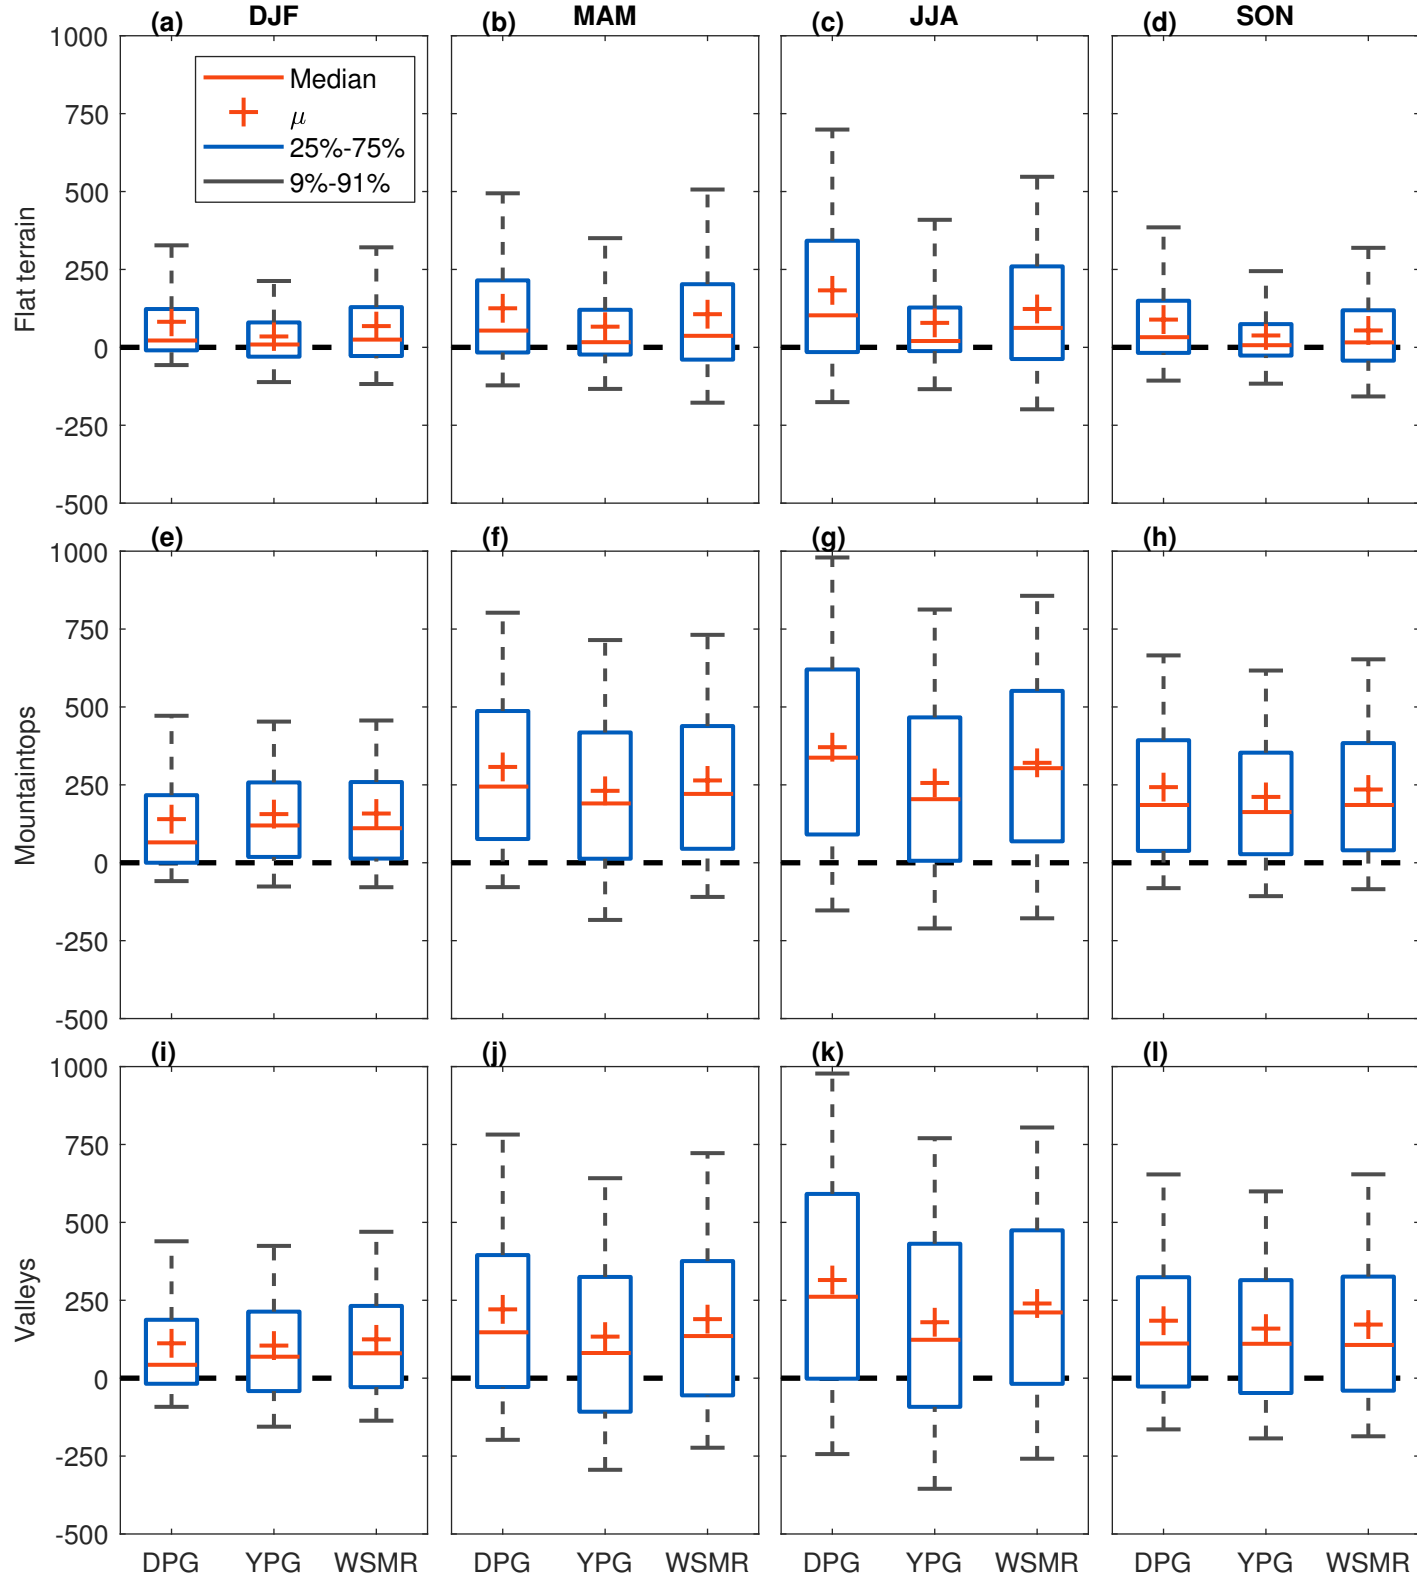

Supplement: s1 [file s1]

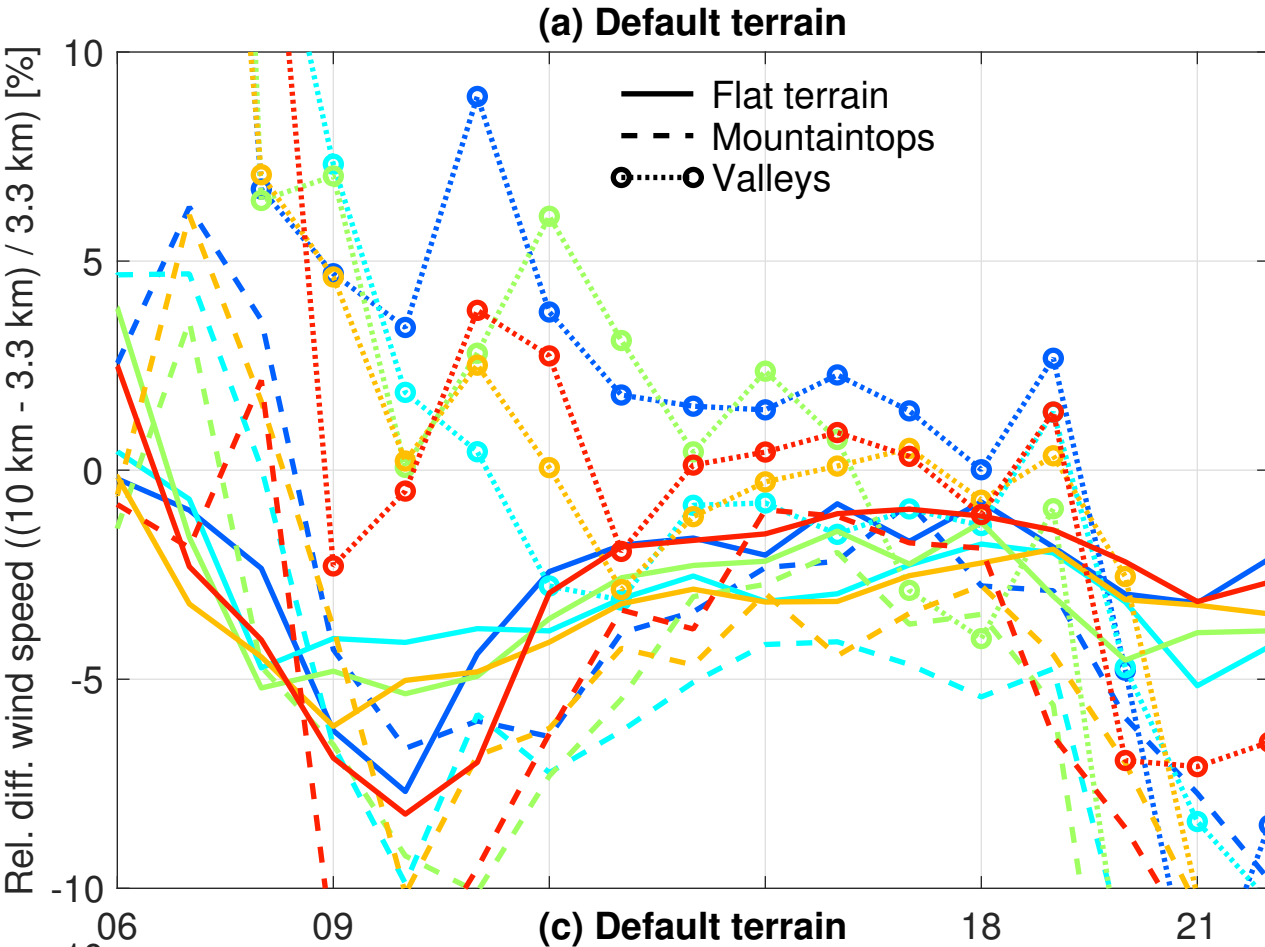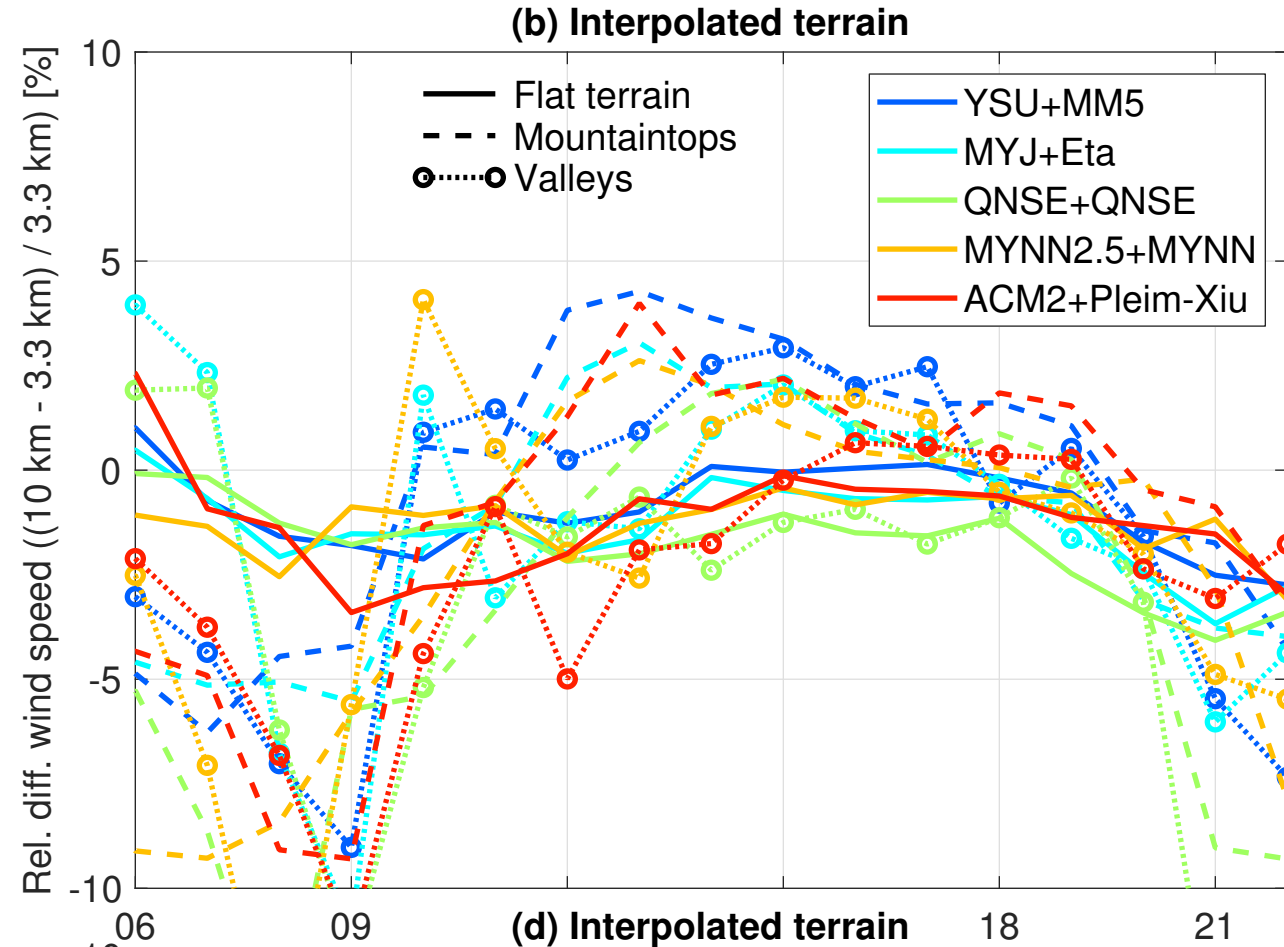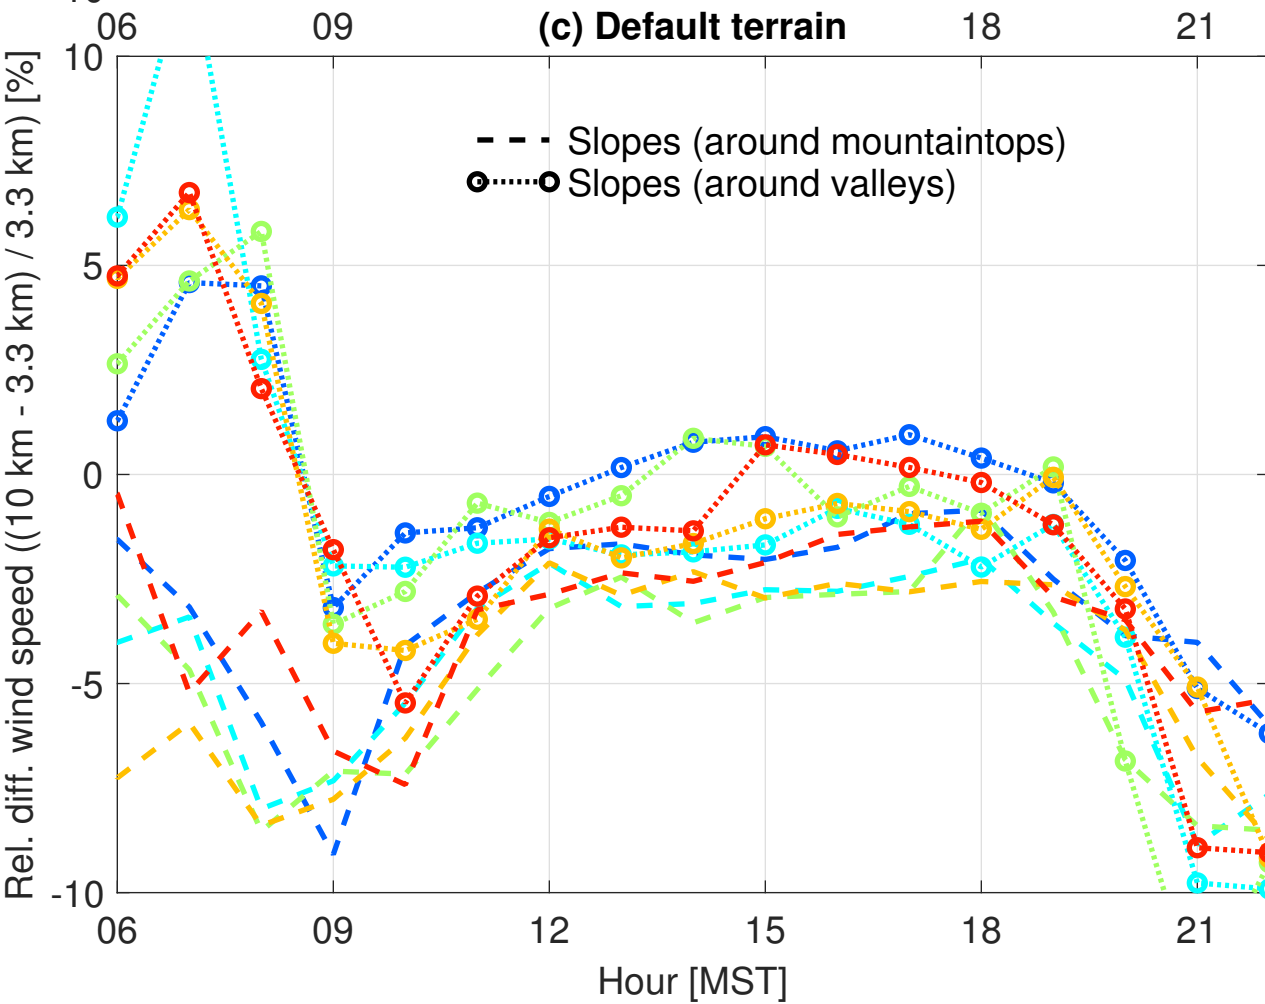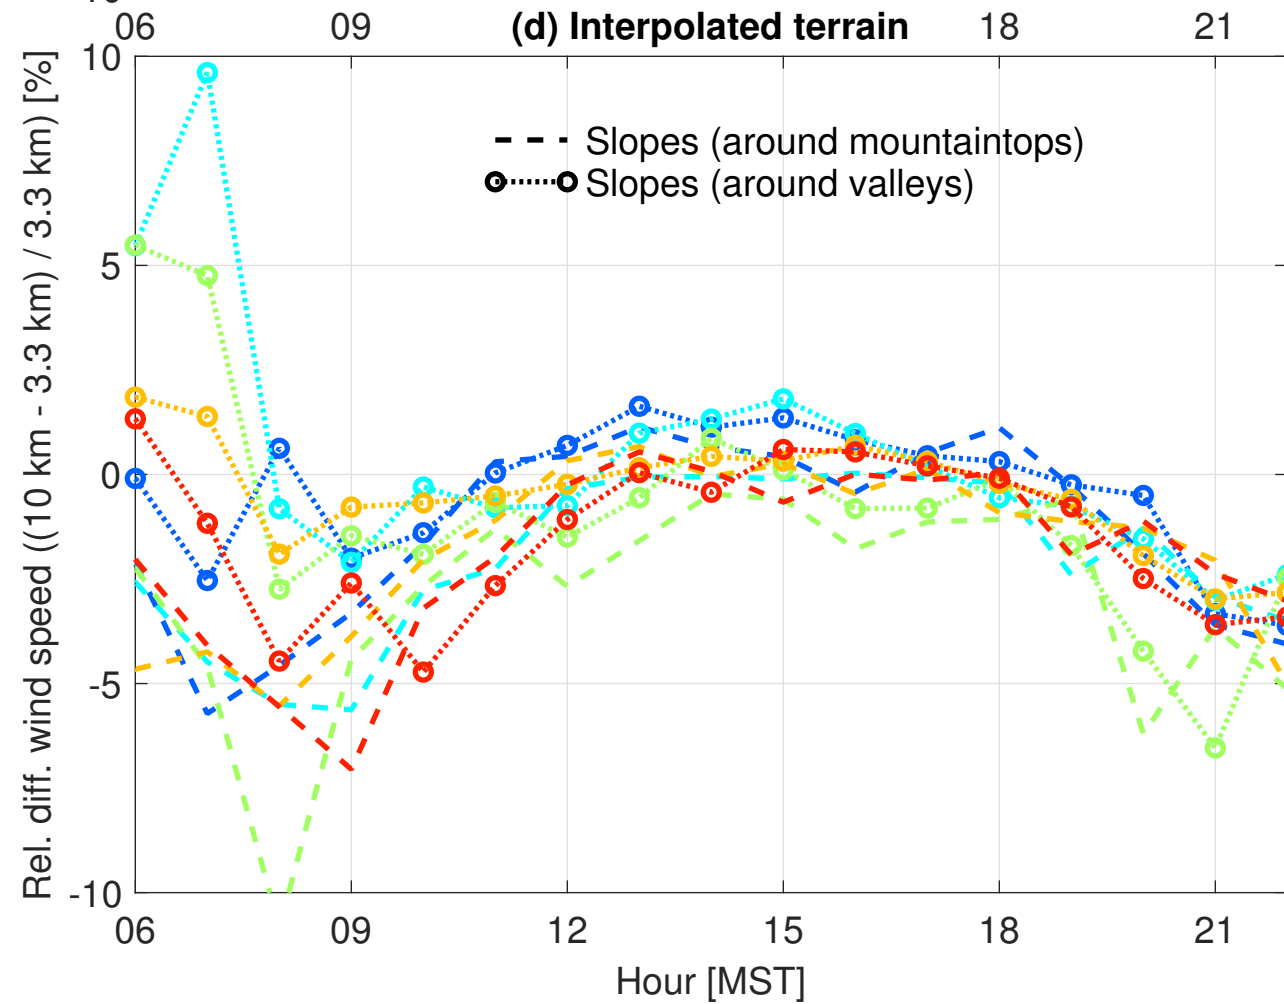

Supplement: s1 [file s1]
